# Supplementary material for: Paediatric reference intervals for ionised calcium – a data mining approach
Source: publisher site journal article supplement (doi:10.1515/cclm-2021-0006), 2021-02-11
Supplement: Supplementary file 1 [file j_cclm-2021-0006_suppl.docx]

**Supplemental Table 1.** Comparison of published reference intervals for ionised calcium in paediatrics

| **Author** | **Age** | **Reference interval (mmol/L)** | **Study methodology** |
| --- | --- | --- | --- |
| Chung (present study) | 0 – 1 week | 1.02 – 1.45 | Indirect approach  (2.5 – 97.5 percentile) following application of exclusion criteria |
| 1 week – 6 months | 1.24 – 1.44 | Indirect approach (Bhattacharya) following application of exclusion criteria |
| 6 months – 2 years | 1.17 – 1.37 |
| 2 – 18 years | 1.13 – 1.33 |
| 0 – 1 week | 1.19 – 1.43 | Indirect approach (*kosmic*) following application of exclusion criteria |
| 1 week – 6 months | 1.24 – 1.43 |
| 6 months – 2 years | 1.17 – 1.34 |
| 2 – 18 years | 1.14 – 1.30 |
| Nelson et al. [7] | 6 – 36 hours | 1.05 – 1.37 | Direct approach in neonates |
| 60 – 84 hours | 1.10 – 1.42 |
| 108 – 132 hours | 1.20 – 1.48 |
| Wandrup et al. [8] | 1 – 12 hours | 1.13 – 1.35 | Direct approach in neonates |
| 13 – 24 hours | 1.07 – 1.31 |
| 25 – 48 hours | 1.08 – 1.34 |
| 49 – 72 hours | 1.08 – 1.36 |
| 73 – 99 hours | 1.12 – 1.46 |
| 99 – 120 hours | 1.23 – 1.47 |
| 121 – 144 hours | 1.25 – 1.49 |
| Marwaha et al. [9] | 6 – 17 years | 1.11 – 1.20 | Direct approach in Indian school children.  Serum sample collection did not appear to have been performed under anaerobic conditions |
| Soldin et al. [10] | 0 – 1 month | 1.0 – 1.5 | Indirect approach  (2.5 – 97.5th percentile) following application of exclusion criteria |
| 1 – 6 months | 0.95 – 1.5 |
