# Supplementary material for: Paediatric reference intervals for ionised calcium – a data mining approach
Source: publisher site journal article supplement (doi:10.1515/cclm-2021-0006), 2021-02-11
Supplement: Supplementary file 2 [file j_cclm-2021-0006_suppl.xlsx]

## Sheet: Sheet1
Age (years)	Ionised Calcium (mmol)
15.2	1.04
1.13	1.34
0.37	1.38
12.58	1.23
6.24	1.28
0.01	1.3
2.88	1.24
1.12	1.31
0.33	1.32
1.37	1.3
0.1	1.35
1.98	1.26
0.39	1.29
14.13	1.28
0.01	1.26
3.28	1.23
0.03	1.32
0.14	1.35
2.09	1.23
1.98	1.2
1.56	1.28
1.22	1.29
7.06	1.26
0.18	1.35
2.4	1.2
3.84	1.22
4.96	1.23
0.03	1.39
2.98	1.26
3.73	1.31
11.34	1.18
0.01	1.27
1.89	1.3
15.12	1.23
4.48	1.19
8.07	1.19
4.2	1.19
13.8	1.15
8.94	1.21
3.12	1.24
0.1	1.36
2.56	1.21
8.02	1.18
0.15	1.25
0.15	1.25
3.32	1.29
0.53	1.27
10.75	1.19
2.35	1.29
2.62	1.26
14.43	1.26
8.31	1.23
4.16	1.28
4.39	1.33
15.39	1.23
3.25	1.27
3.02	1.21
10.87	1.28
4.51	1.23
0.15	1.39
5.89	1.16
15.14	1.27
11.37	1.15
1.03	1.22
0.26	1.31
0.48	1.31
0.71	1.3
1.76	1.3
0.27	1.35
0.66	1.27
0.07	1.34
14.27	1.26
0.21	1.29
11.4	1.26
4.32	1.25
7.41	1.18
0.06	1.35
12.11	1.26
2.19	1.29
0.94	1.23
13.5	1.21
1.97	1.22
5.39	1.24
1.16	1.15
12.93	1.18
1.92	1.25
5.87	1.29
0.33	1.32
8.97	1.25
2.7	1.21
0.54	1.23
0.19	1.31
13.2	1.06
0.02	1.42
14.27	1.27
0.01	1.45
0.06	1.42
9.74	1.23
0.36	1.29
0.22	1.31
4.89	1.18
8.24	1.25
8.17	1.25
0.25	1.33
6.59	1.24
9.14	1.23
7.12	1.21
0.11	1.37
0.09	1.27
13.76	1.14
14.08	1.16
3.02	1.22
5.24	1.28
1.53	1.28
0.08	1.28
1.57	1.2
6.49	1.17
0.29	1.27
15.14	1.25
0.13	1.38
1.13	1.26
15.3	1.19
1.57	1.25
0.06	1.38
8.74	1.25
1.64	1.25
0.61	1.27
11.81	1.23
3.3	1.14
0.09	1.31
5.47	1.26
0.01	1
17.35	1.13
3.24	1.23
2.03	1.25
1.05	1.3
13.7	1.24
1.07	1.23
14.91	1.27
1.07	1.29
0.26	1.36
10.63	1.28
7.39	1.25
2	1.22
15.58	1.24
0.72	1.23
1.3	1.27
0.12	1.46
1.73	1.22
3.78	1.28
6.38	1.22
0.09	1.32
3.97	1.37
0.92	1.29
0.69	1.26
0.08	1.36
3.23	1.21
3.84	1.27
0.43	1.33
0.28	1.21
0.9	1.32
8.28	1.18
5.3	1.24
1.89	1.35
0.05	1.35
1.87	1.25
17.92	1.29
5.82	1.28
16.52	1.16
0.23	1.37
9.24	1.23
7.12	1.28
4.47	1.25
2.63	1.19
6.42	1.22
3.24	1.2
1.16	1.26
0.03	1.33
0.73	1.2
7.13	1.22
10.21	1.25
2.47	1.23
0.2	1.35
3.28	1.25
14.38	1.23
14.64	1.28
0.48	1.31
1.93	1.2
10.49	1.17
7.53	1.19
0.03	1.42
4.46	1.17
8.16	1.21
0.01	1.29
0.01	1.17
1.55	1.29
1.99	1.22
4.85	1.21
6.87	1.25
10.56	1.15
5.22	1.23
11.41	1.19
9.52	1.25
0.37	1.36
7.63	1.26
13.01	1.32
11.64	1.21
7.89	1.17
1.02	1.25
1.13	1.26
6.12	1.18
17.91	1.17
1.82	1.25
0.64	0.96
6.34	1.13
0.13	1.29
1	1.25
6.33	1.28
0.39	1.31
14.4	1.22
7.41	1.27
7.94	1.2
3.61	1.23
2.19	1.17
7.86	1.19
15.59	1.25
0.72	1.25
4.67	1.26
0.02	1.34
0.35	1.36
3.73	1.25
7.69	1.27
3.29	1.24
7.23	1.22
0.47	1.32
0.14	1.32
0.79	1.35
5.08	1.16
8.26	1.18
1.37	1.32
3.55	1.16
1.91	1.26
9.31	1.25
0.25	1.32
6.27	1.22
0.3	1.39
0.39	1.21
3.51	1.23
10.31	1.21
2.45	1.27
0.14	1.31
0.01	1.16
1.32	1.21
3.24	1.25
0.38	1.23
0.01	1.3
4.84	1.25
14.86	1.24
1.1	1.28
11.39	1.16
8.9	1.18
14.07	1.14
5.85	1.19
8.18	1.25
10.32	1.15
0.96	1.36
14.56	1.25
10.79	1.21
0.07	1.43
2.95	1.28
15.72	1.19
9.63	1.22
4.02	1.24
6.84	1.24
6.66	1.05
13.24	1.22
6.16	1.27
12.23	1.24
0.72	1.24
6.04	1.24
2.12	1.16
0.01	1.45
0.02	1.34
14.13	1.22
0.37	1.34
10.1	1.33
12.03	1.25
0.08	1.32
0.08	1.36
4.87	1.29
6.9	1.11
6.49	1.12
10.52	1.17
1.45	1.32
10.16	1.29
10.2	1.16
3.28	1.17
10.28	1.21
2.09	1.28
8.81	1.28
8.22	1.26
8.19	1.2
8.6	1.16
12.6	1.19
1.76	1.27
1.07	1.1
9.78	1.23
13.45	1.07
0.56	1.3
6.48	1.22
10.26	1.24
3.04	1.24
0.39	1.31
1.98	1.27
3.1	1.25
6.54	1.28
0.25	1.35
4.71	1.25
1.7	1.31
0.64	1.38
2.42	1.29
14.82	1.35
1.07	1.21
1.74	1.23
13.8	1.22
8.47	1.24
0.25	1.34
0.04	1.38
0.15	1.36
1.76	1.31
10.31	1.22
10.96	1.31
0.19	1.36
7.16	1.12
9.75	1.26
0.03	1.31
0.04	1.42
7.32	1.21
15.71	1.17
6.38	1.28
0.89	1.31
1.97	1.27
10.01	1.16
1.76	1.29
0.62	1.28
0.96	1.25
9.42	1.26
6.56	1.11
0.06	1.42
0.2	1.28
5.09	1.24
0.22	1.29
0.01	1.02
2.71	1.2
1.91	1.2
3.61	1.2
4.1	1.15
2	1.31
13.9	1.23
0.32	1.33
0.28	1.31
1.53	1.31
14.09	1.21
14.66	1.3
10.38	1.28
0.78	1.26
0.16	1.34
0.95	1.25
2.32	1.28
15.75	1.23
1.2	1.29
4.56	1.26
7.02	1.22
0.16	1.33
0.03	1.42
0.07	1.24
10.64	1.17
10	1.18
1.28	1.3
1	1.32
0.01	1.32
7.31	1.2
5.51	1.28
0.13	1.38
0.04	1.26
0.52	1.34
1.53	1.17
0.36	1.31
1.34	1.26
16.17	1.25
0.99	1.28
14.88	1.26
0.28	1.3
0.31	1.26
1.89	1.27
3.2	1.32
0.74	1.27
13.4	1.27
7.81	1.3
1.37	1.22
0.31	1.36
3.26	1.18
12.91	1.22
2.53	1.21
2.94	1.26
7.6	1.38
1.49	1.19
1.39	1.32
6.06	1.21
4.06	1.22
1.63	1.28
0.51	1.32
0.88	1.23
0.26	1.25
0.1	1.26
15.67	1.29
9.79	1.26
2.04	1.23
3.45	1.21
0.08	1.35
6.84	1.18
9.73	1.37
0.08	1.42
2.57	1.29
10.29	1.23
0.1	1.3
6.13	1.18
13.84	1.2
2.02	1.23
6.15	1.23
0.27	1.33
1.99	1.2
12.27	1.17
12.16	1.11
7.68	1.24
2.99	1.15
15.43	1.19
5.51	1.19
1.78	1.29
1.07	1.31
0.18	1.43
8.29	1.23
0.17	1.43
1.76	1.27
2.71	1.18
15.13	1.21
2.28	1.09
4.88	1.18
2.58	1.15
0.67	1.35
3.6	1.33
9.18	1.26
0.01	1.24
5.85	1.17
1.86	1.31
0.03	1.38
0.03	1.39
8.9	1.28
9.31	0.89
0.12	1.39
5	1.11
0.32	1.31
10.33	1.21
1	1.33
0.02	1.21
5.75	1.26
0.23	1.27
9.06	1.2
0.12	1.38
0.16	1.21
12.87	1.21
5.09	1.23
8.13	1.22
2.54	1.21
9.64	1.28
0.1	1.33
7.79	1.25
0.08	1.26
1.09	1.3
8.82	1.19
4.06	1.3
7.24	1.13
3.99	1.22
1.23	1.39
13.7	1.19
9.01	1.23
0.79	1.27
6.04	1.24
1.73	1.27
1.05	1.33
4.01	1.25
5.52	1.23
0.98	1.18
2.89	1.16
2.61	1.04
3.52	1.17
0.5	1.34
3.44	1.23
13.67	1.2
8.67	1.17
6.18	1.21
3.62	1.19
1.57	1.19
2.22	1.16
2.4	1.25
6.82	1.26
11.44	1.31
1.86	1.23
0.82	1.33
6.98	1.24
11.18	1.2
0.4	1.35
0.03	1.41
13.91	1.03
1.34	1.19
10.9	1.18
2.58	1.22
0.06	1.27
7.6	1.22
1.48	1.2
8.22	1.33
13.02	1.17
12.8	1.26
5.37	1.19
0.01	1.08
2.72	1.27
2.93	1.3
1.8	1.26
0.34	1.34
4.05	1.23
0.07	1.35
0.07	1.34
0.5	1.35
11.47	1.18
0.05	1.34
0.22	1.36
1.58	1.22
5.95	1.21
0.07	1.31
0.09	1.35
0.9	1.28
0.17	1.21
8.96	1.18
0.09	1.37
0.35	1.31
11.61	1.27
11.22	1.27
4.09	1.15
0.03	1.39
13.53	1.26
7.92	1.17
0.13	1.33
0.15	1.4
1.23	1.21
1.17	1.27
9.57	1.14
1.49	1.24
11.76	1.28
9.95	1.14
5.82	1.16
0.68	1.26
4.63	1.29
0.03	1.39
0.11	1.21
10.52	1.24
0.47	1.39
1.15	1.24
0.22	1.31
0.05	1.36
4.28	1.19
0.12	1.34
0.27	1.26
11.87	1.24
0.19	1.36
0.07	1.42
3.57	1.16
12.19	1.24
7.44	1.32
14.56	1.17
4.23	1.26
0.23	1.37
1.51	1.3
1.39	1.3
0.08	1.39
10.73	1.13
13.1	1.2
1.21	1.26
4.5	1.25
12.22	1.22
3.91	1.12
4.57	1.17
0.03	1.39
4.43	1.14
3.24	1.3
13.43	1.26
7.68	1.29
16.07	1.3
10.73	1.18
5.26	1.29
8.41	1.23
15.2	1.25
0.25	1.35
1.06	1.24
1.71	1.19
3.68	1.21
3.04	1.21
10.53	1.21
0.16	1.35
12.87	1.3
5.87	1.22
7.33	1.23
0.36	1.33
0.82	1.23
2.71	1.23
5.78	1.22
4.01	1.17
0.04	1.33
10.53	1.22
0.2	1.3
4.24	1.22
0.21	1.29
14.36	1.16
0.5	1.31
10.73	1.16
5.22	1.22
2.03	1.27
6.85	1.19
4.93	1.21
10.42	1.28
8.7	1.19
15.65	1.18
0.1	1.35
1.1	1.22
8.5	1.17
7.64	1.25
2.88	1.28
8	1.23
0.05	1.43
6.41	1.26
4.5	1.29
0.97	1.34
6.01	1.27
0.17	1.31
0.21	1.23
17.01	1.19
1.02	1.28
14.61	1.15
10.07	1.24
11.88	1.26
0.32	1.3
15.89	1.25
1.73	1.22
2.14	1.22
3.2	1.24
15.64	1.21
1.45	1.25
3.22	1.38
15.52	1.22
7.04	1.25
2.82	1.2
1.2	1.25
0.63	1.28
15.68	1.28
1.7	1.23
0.01	1.21
10.15	1.19
14.08	1.18
4.94	1.17
10.95	1.27
2.87	1.19
8.33	1.21
0.65	1.31
0.31	1.33
4.07	1.23
8.71	1.19
3.53	1.14
0.19	1.31
4.29	1.32
3.49	1.21
5.64	1.27
0.1	1.36
2.04	1.24
0.01	1.24
0.75	1.31
4.73	1.21
0.15	1.38
9.77	1.24
2.73	1.27
8.67	1.23
0.04	1.42
2.3	1.27
5.36	1.27
2.79	1.18
14.4	1.29
0.4	1.25
8.47	1.27
5.68	1.27
10.79	1.2
0.2	1.31
1.31	1.33
0.22	1.31
1.59	1.38
8.31	1.28
11.52	1.24
0.13	1.27
12.06	1.15
1.81	1.22
7.79	1.22
3.01	1.28
15.68	1.17
0.03	1.39
0.24	1.33
0.21	1.33
0.95	1.2
0.01	1.38
13.15	1.11
12.97	1.08
5.74	1.2
1.99	1.26
14.98	1.25
1.63	1.21
0.25	1.27
3.35	1.25
1.14	1.31
2.96	1.26
5.36	1.27
2.27	1.25
0.05	1.29
3.74	1.12
0.09	1.33
1.22	1.14
14.89	1.25
6.25	1.29
1.88	1.25
15.3	1.25
13.38	1.25
0.05	1.23
0.1	1.36
0.01	1.37
0.31	1.3
8.75	1.2
12.57	1.21
17.93	1.21
0.06	1.37
5.65	1.24
0.6	1.33
0.09	1.23
0.97	1.39
0.03	1.37
4.6	1.21
3.73	1.25
10.4	1.22
3.71	1.26
15.39	1.24
0.79	1.32
0.34	1.23
0.68	1.31
4.77	1.22
16.22	1.87
0.55	1.32
0.15	1.32
0.03	1.46
3.69	1.28
0.12	1.41
4.51	1.31
10.84	1.21
0.14	1.37
13.85	1.26
1.58	1.3
0.06	1.3
3.06	1.21
12.22	1.24
0.16	1.29
0.02	1.38
3.9	1.2
9.71	1.21
0.06	1.32
0.64	1.29
3.14	1.2
3.18	1.26
12.34	1.19
9.51	1.25
1.77	1.28
13.38	1.3
1.04	1.29
0.43	1.32
0.36	1.26
6.53	1.26
11.7	1.18
3.57	1.24
5.46	1.17
6.54	1.27
13.61	1.2
6.95	1.27
4.13	1.29
0.71	1.31
0.09	1.38
12.53	1.27
2.58	1.41
0.09	1.35
1.9	1.26
9.33	1.3
5.91	1.3
0.1	1.18
2.67	1.3
0.03	1.29
4.34	1.25
15.83	1.15
15.23	1.26
2.54	1.28
12.08	1.17
2.16	1.15
9.15	1.24
13.09	1.08
4.45	1.22
17.96	1.15
12.02	1.23
13.15	1.24
0.21	1.37
10.95	1.18
5.74	1.28
0.05	1.41
3.67	1.2
1.5	1.18
9.62	1.26
9.84	1.25
14.61	1.24
0.08	1.36
0.95	1.25
0.13	1.37
4.51	1.25
3.09	1.32
0.12	1.36
12.78	1.22
2.23	1.26
13.95	1.28
0.11	1.34
2.58	1.24
0.17	1.3
0.93	1.25
0.82	1.23
0.68	1.31
5.93	1.22
1.23	1.2
10.8	1.2
0.14	1.33
0.5	1.32
1.09	1.31
2.17	1.28
15.09	1.26
1.29	1.25
5.6	1.17
0.13	1.44
13.56	1.31
14.43	1.19
6.22	1.21
0.1	1.29
0.96	1.28
0.06	1.3
6.59	1.3
0.03	1.25
4.32	1.29
6.9	1.23
0.65	1.18
3.3	1.35
5.58	1.18
0.58	1.34
3.34	1.21
0.05	1.41
1.91	1.27
1.77	1.25
8.78	1.13
5.57	1.15
5.2	1.2
0.01	1.28
1.61	1.25
0.22	1.26
6.9	1.2
14.15	1.23
1.37	1.33
0.04	1.37
15.43	1.21
0.29	1.26
0.09	1.24
12.63	1.26
0.53	1.26
9.73	1.27
6.63	1.27
4.29	1.19
11.42	1.22
6.69	1.18
15.3	1.15
0.64	1.38
4.52	1.26
4.19	1.28
1.5	1.29
4.93	0.94
3.05	1.26
8.25	1.21
4.96	1.16
13.29	1.27
3.96	1.31
5.25	1.22
6.88	1.27
0.07	1.24
2.91	1.28
1.98	1.26
8.34	1.21
4.39	1.13
10.69	1.09
3.03	1.29
4.15	1.18
14.71	1.26
2.86	1.28
0.15	1.34
1.3	1.3
0.05	1.36
0.41	1.25
0.02	1.36
10.94	1.3
11.61	1.21
14.95	1.21
5.34	1.26
6.53	1.23
4.63	1.24
6.32	1.22
6.5	1.27
0.43	1.22
12.99	1.21
1.63	1.11
10.99	1.19
13.43	1.25
8.45	1.31
13.83	1.19
3.73	1.26
1.29	1.18
1.09	1.29
1.61	1.35
9.81	1.22
14.07	1.2
9.43	1.14
10.63	1.18
0.54	1.32
0.1	1.31
13.09	1.15
11.05	1.19
17.29	1.18
4.38	1.12
15.74	1.24
6.91	1.24
11.88	1.1
0.19	1.32
0.25	1.25
0.02	1.51
6.3	1.36
0.5	1.28
0.24	1.26
5.7	1.2
11.05	1.18
0.09	1.3
4.47	1.2
4.3	1.19
13.6	1.22
0.01	1.34
6.68	1.24
1.63	1.29
11.94	1.16
17.4	1.2
2.9	1.18
12.7	1.25
0.07	1.36
5.04	1.21
0.77	1.23
9.54	1.23
16.61	1.2
1.28	1.29
2.12	1.25
4.6	1.12
2.81	1.28
12.53	1.21
9.55	1.21
15.44	1.21
1.85	1.22
10.63	1.28
10.26	1.25
4.47	1.29
0.25	1.4
12.09	1.29
11.53	1.26
15.7	1.27
1.1	1.3
1.29	1.3
0.11	1.27
12.83	1.17
4.77	1.21
0.95	1.27
0.58	1.3
2	1.2
2.36	1.25
0.01	1.33
12.35	1.15
1.68	1.28
0.64	1.25
15.84	1.23
9.5	1.2
0.36	1.39
5.24	1.16
6.43	1.25
11.69	1.24
0.18	1.33
8.02	1.22
0.14	1.36
2.94	1.25
13.77	1.2
15.71	1.21
7.02	1.24
5.72	1.21
0.21	1.31
6.59	1.26
2.88	1.27
5.54	1.27
10.9	1.17
15.52	1.29
0.03	1.42
1.5	1.23
10.31	1.24
10.51	1.21
7.87	1.27
14.89	1.27
0.04	1.45
1.66	1.18
3	1.21
2.57	1.33
0.03	1.31
13.33	1.22
8.59	1.24
7.55	1.35
0.11	1.28
4.2	1.17
0.18	1.34
13.83	1.24
0.55	1.34
2.35	1.25
13.45	1.24
1.7	1.27
13.2	1.19
4.75	1.15
9.6	1.26
7.55	1.26
0.22	1.24
4.63	1.23
13.54	1.23
16.92	1.23
0.22	1.4
2.11	1.31
17.09	1.27
0.24	1.4
4.6	1.23
9.78	1.22
5.46	1.18
11.79	1.16
0.02	1.45
9.87	1.26
12.39	1.22
4.98	1.35
6.62	1.17
9.6	1.16
1.64	1.22
3.49	1.19
6.09	1.14
0.14	1.3
13.17	1.24
7.86	1.28
5.76	1.14
3.41	1.38
0.14	1.37
15.51	1.2
12.06	1.23
1.45	1.22
4.95	1.23
11.94	1.3
0.12	1.4
2.32	1.3
1.04	1.28
12.61	1.27
3.68	1.29
1.68	1.22
0.24	1.31
11.37	1.22
1.48	1.2
0.11	1.38
0.16	1.28
12.2	1.21
8.71	1.25
11.72	1.24
0.01	1.41
8.4	1.19
1.58	1.26
0.15	1.24
9.02	1.24
4.58	1.23
11	1.19
0.09	1.39
7.36	1.29
9.83	1.23
0.08	1.41
0.9	1.28
1.49	1.19
1.85	1.31
1.83	1.26
0.13	1.39
7.22	1.27
5.49	1.26
7.93	1.23
1.31	1.25
4.77	1.24
2.74	1.22
13.52	1.29
12.95	1.17
0.94	1.19
3.71	1.23
3.12	1.35
0.03	1.42
0.66	1.33
0.08	1.29
0.93	1.31
15.1	1.12
10.16	1.21
1.86	1.27
0.1	1.32
1.52	1.31
6.1	1.31
15.42	1.24
0.19	1.34
14.45	1.22
16.6	1.14
6.13	1.25
5.08	1.31
0.14	1.37
14.67	1.26
8.72	1.24
11.22	1.18
4.59	1.1
0.16	1.39
0.15	1.37
0.46	1.18
2.76	1.23
3.29	1.26
4.61	1.26
0.73	1.26
4.8	1.18
8.22	1.24
0.24	1.27
0.04	1.75
14.5	1.23
3.04	1.21
2.54	1.26
0	1.09
0.08	1.41
13.72	1.23
2.17	1.26
10.47	1.21
11.95	1.29
0.78	1.31
6.41	1.34
9.13	1.07
0.45	1.31
8.82	1.1
14.05	1.22
10	1.24
7.15	1.34
6.49	1.21
0.14	1.31
0.51	1.28
2.51	1.33
0.73	1.39
7.49	1.36
5.16	1.19
2.94	1.19
0.04	1.33
1.97	1.22
0.24	1.38
14.12	1.15
1.55	1.27
4.73	1.25
7.45	1.2
1.6	1.22
0.57	1.26
9.06	1.16
15.29	1.21
13.43	1.25
0.24	1.33
6.66	1.22
6.75	1.18
13.54	1.17
1.18	1.42
11.62	1.25
2.13	1.27
0.17	1.4
2.53	1.22
7.41	1.22
0.85	1.4
13.23	1.23
2.18	1.35
0.27	1.33
3.33	1.11
12.04	1.16
5.01	1.25
0.13	1.28
4.1	1.21
1.67	1.23
14.97	1.23
13.55	1.25
0.05	1.44
2.74	1.23
0.23	1.41
1.17	1.2
8.11	1.15
6.39	1.15
0.11	1.3
13.94	1.25
1.52	1.27
1.55	1.25
1.42	1.32
2.32	1.2
2.58	1.21
9.78	1.21
5.34	1.2
9.75	1.26
6.28	1.16
0.32	1.22
16.59	1.2
7.42	1.3
8.63	1.21
1.1	1.23
4.62	1.22
0.18	1.32
7.23	1.14
4.91	1.26
2.75	1.28
15.48	1.2
1.02	1.34
13.22	1.18
1.46	1.22
1.32	1.23
1.07	1.31
0.13	1.28
1.85	1.2
15.63	1.2
8.37	1.18
9.54	1.19
5.84	1.29
1.46	1.22
0.68	1.23
15.85	1.25
1.3	1.17
15.54	1.2
5.49	1.17
8.35	1.2
0.63	1.46
0.62	1.29
2.83	1.25
1.66	1.31
1.61	1.31
15.81	1.28
10.15	1.25
5.36	1.14
3.84	1.29
9.04	1.23
5.28	1.21
7.52	1.23
0.25	1.04
1.74	1.16
3.49	1.25
1.8	1.19
8.2	1.27
10.46	1.31
11.51	1.23
2.33	1.12
11.9	1.13
9.55	1.26
1.65	1.25
9.42	1.16
7.49	1.2
7.8	1.15
12.34	1.19
6.86	1.27
11.74	1.22
1.89	1.25
10.61	1.25
13.15	1.25
2.08	1.23
3.81	1.15
8.67	1.21
8.21	1.23
11.51	1.18
0.01	1.2
0.02	1.48
14.59	1.16
0.21	1.3
0.16	1.32
5.61	1.25
0.04	1.48
13.86	1.26
0.6	1.28
1.36	1.29
0.79	1.35
2.24	1.23
14.19	1.31
0.04	1.41
1.52	1.22
8.24	1.2
5.93	1.23
8.72	1.25
10.81	1.21
15.63	1.24
14.68	1.2
0.01	1.32
8.54	1.15
0.36	1.29
9.04	1.28
0.89	1.37
0.94	1.37
0.01	1.02
3.74	1.23
9.21	1.22
6.16	1.25
8.44	1.23
0.2	1.3
0.86	1.33
2.75	1.24
13.1	1.27
11.89	1.22
10.52	1.2
5.65	1.25
0.15	1.4
1.67	1.31
15.74	1.11
1.3	1.3
1.98	1.22
0.84	1.25
12.12	1.28
0.25	1.24
5.39	1.16
6.22	1.17
0.23	1.33
0.01	1.18
11.84	1.22
6.43	1.21
15.37	1.17
11.93	1.16
0.25	1.26
0.03	1.36
0.39	1.34
1.8	1.23
1.74	1.17
0.15	1.29
2.41	1.24
15.15	1.19
6.33	1.28
2.81	1.22
6.03	1.2
9.94	1.27
2.8	1.33
0.03	1.32
0.25	1.27
13.81	1.23
9.41	1.13
0.03	1.41
3.09	1.25
0.79	1.19
12.15	1.26
14.95	1.24
0.89	1.26
1.45	1.34
2.07	1.29
1.96	1.29
1.31	1.24
4.08	1.25
0.32	1.33
2.55	1.17
10.35	1.21
0.85	1.34
2.08	1.31
17.35	1.21
11.95	1.28
11.42	1.27
15.03	1.26
10.82	1.27
3.15	1.2
1.85	1.35
14.33	1.1
0.13	1.31
6.8	1.29
0.14	1.32
1.84	1.06
1.52	1.31
3.45	1.32
1.8	1.25
0.24	1.28
2.24	1.19
3.3	1.24
6.22	1.21
2.44	1.26
6.26	1.33
3.33	1.2
4.13	1.13
1.4	1.27
0.05	1.36
4.84	1.23
2.16	1.22
3.21	1.27
15.12	1.21
11.21	1.21
3.04	1.2
0.08	1.33
0.03	1.39
0.08	1.34
6.81	1.29
12.76	1.25
14.35	1.26
0	1.15
11.01	1.21
0.19	1.38
1.99	1.18
0	1.17
1.08	1.23
0	1.19
0.45	1.3
15.52	1.24
1.66	1.19
0.26	1.28
0.1	1.4
0.29	1.38
11.1	1.19
0.05	1.3
5.14	1.21
15.63	1.25
0.23	1.33
0.21	1.34
13.81	1.17
0.23	1.3
14.01	1.17
4.13	1.26
11.23	1.18
1.47	1.34
2.48	1.28
14.12	1.22
0.02	1.38
12.84	1.2
2.94	1.22
13.28	1.16
14.23	1.25
0.82	1.39
1.93	1.19
2.53	1.13
5.26	1.27
12.75	1.22
6.34	1.24
2.32	1.26
0.08	1.29
0.24	1.31
4.82	1.23
1.84	1.22
0.28	1.34
0.24	1.28
4.66	1.25
11.5	1.17
0.02	1.36
1.32	1.23
11.01	1.25
0.42	1.25
0.17	1.21
17.7	1.17
4.44	1.27
1.63	1.33
5.29	1.22
0.07	1.34
1.99	1.3
3.93	1.28
0.15	1.35
16.13	1.19
11.73	1.01
0.9	1.34
0.02	1.4
2.45	1.21
14.32	1.22
11.26	1.31
2.65	1.26
12.12	1.27
9.71	1.21
1.3	1.3
5.76	1.12
1.67	1.15
6.06	1.24
1	1.35
0.44	1.36
1.23	1.21
0.05	1.26
0.4	1.3
1.31	1.21
8.84	1.19
0.1	1.4
1.34	1.27
9.84	1.27
0.52	1.22
0.18	1.35
9.69	1.22
0.05	1.27
8.99	1.17
12.11	1.18
0.07	1.38
0.01	1.13
0.82	1.24
16.25	1.24
0.07	1.37
3.98	1.29
12.57	1.26
2.06	1.21
14.08	1.22
1.98	1.23
11.4	1.26
12.49	1.14
0.11	1.37
13.74	1.19
13.57	1.21
4.48	1.19
3.6	1.22
0.08	1.35
1.64	1.24
0.91	1.28
4.04	1.19
0.06	1.33
15.89	1.12
6.78	1.24
0.07	1.41
1.97	1.28
1.24	1.28
17.77	1.22
5.57	1.19
1.5	1.23
12.95	1.26
16.42	0.31
13.68	1.19
0.39	1.27
12.32	1.26
4.93	1.21
2.93	1.24
0.21	1.25
11.34	1.15
2.1	1.21
12.5	1.19
1.91	1.27
4.47	1.15
4.89	1.23
0.12	1.32
7.16	1.28
0.68	1.25
1.84	1.21
6.05	1.17
1.22	1.27
9.29	1.1
0.41	1.34
0.14	1.19
0.81	1.34
0.38	1.33
6.33	1.23
3.29	1.28
0.1	1.37
0.28	1.27
0.38	1.28
13.72	1.28
0.47	1.35
8.43	1.3
1.1	1.24
0.08	1.35
0.14	1.3
1.14	1.25
0.1	1.31
5.87	1.14
1.61	1.35
11.16	1.31
2.39	1.28
0.01	1.48
9.48	1.25
14.89	1.18
0.22	1.38
8.88	1.22
1.7	1.29
0.26	1.36
12.81	1.22
11.07	1.2
15.67	1.31
1.55	1.29
11.83	1.16
0.13	1.32
11.1	1.25
3.19	1.22
0.13	1.36
0.08	1.32
10.03	1.19
6.59	1.18
16.67	1.25
13.47	1.17
0	1.14
0.23	1.31
0.31	1.26
0.59	1.25
3.02	1.29
2.62	1.19
16.92	1.25
5.22	1.23
4.97	1.26
0.08	1.29
5.46	1.23
10.94	1.32
1.51	1.2
1.26	1.07
0.01	1.12
0.11	1.33
2.43	1.22
2.43	0.97
1.58	1.27
0.04	1.3
14.07	1.19
10.76	1.23
6.27	1.29
0.01	1.38
9.12	1.18
5.86	1.24
0.92	1.3
8.13	1.43
3.05	1.26
0.02	1.41
1.89	1.23
7.75	1.15
3.4	1.13
2.06	1.28
10.65	1.23
0.32	1.35
4.05	1.14
4.46	1.18
6.93	1.23
6.68	1.12
2.9	1.19
1.51	1.38
7	1.21
12.44	1.21
1.18	1.17
9.66	1.27
3.5	1.21
0.01	1.37
13.16	1.24
15.75	1.2
3.02	1.27
8.33	1.24
10.36	1.16
2.38	1.2
0.79	1.4
0.54	1.28
0.84	1.23
1.14	1.27
13.93	1.29
9.48	1.15
1.36	1.35
0.16	1.34
8.21	1.24
0.37	1.34
0.02	1.21
10.78	1.23
1.52	1.31
1.64	1.24
0.31	1.18
0.94	1.2
0.22	1.42
5.22	1.25
0.1	1.18
0.17	1.34
1.9	1.3
0.06	1.36
1.18	1.04
15.93	1.11
12.65	1.21
3.37	1.25
0.05	1.33
2.88	1.21
14.07	1.14
10.12	1.17
2.27	1.24
5.4	1.2
13.35	1.16
3.74	1.3
15.76	1.28
1.12	1.23
0.62	1.25
0.08	1.33
0.6	1.25
12.86	1.21
15.35	1.26
5.29	1.25
2.04	1.15
13.65	1.21
15.89	1.12
0.84	1.32
16.77	1.26
0.05	1.34
17	1.18
0.73	1.34
11.19	1.33
0	1.2
16.64	1.24
0.31	1.3
2.9	1.16
9.87	1.22
3.49	1.24
0.3	1.32
3.03	1.31
6.86	1.21
1.94	1.3
1.18	1.3
2.37	1.23
6.75	1.19
4.38	1.22
0.21	1.35
0.54	1.3
6.3	1.2
1.76	1.22
0.86	1.27
4.13	1.55
3.82	1.23
7.07	1.19
0.5	1.17
8.07	1.23
0.72	1.31
5.03	1.21
11.59	1.19
0.07	1.39
14.42	1.21
0.41	1.32
6.71	1.25
1.67	1.24
1.27	1.26
8.14	1.24
5.13	1.16
0.43	1.27
9.59	1.26
4.2	1.32
10.53	1.23
12.01	1.24
15.01	1.13
16.69	1.25
2.44	1.25
1.45	1.23
1.98	1.08
4.79	1.31
2.61	1.2
0.06	1.25
12.61	1.2
7.52	1.23
0.12	1.29
1.29	1.17
13.19	1.28
5.1	1.21
8.13	1.3
2.98	1.21
0.13	1.34
0.09	1.33
0.91	1.25
0.02	1.41
2.8	1.25
0.96	1.33
9.15	1.24
3.77	1.15
10.3	1.23
5.97	1.18
6.51	1.21
7.63	1.14
0.04	1.33
12.11	1.11
5.71	1.26
4.91	1.16
4.07	1.23
13.31	1.29
8.93	1.29
4.74	1.26
2.4	1.28
14.16	1.25
3.04	1.28
0.4	1.35
10.92	1.25
0.22	1.34
1.15	1.21
14.06	1.22
4.8	1.21
1.23	1.39
0.14	1.34
0.94	1.16
2.19	1.26
0.04	1.43
15.71	1.17
5.2	1.22
0.07	1.35
0.75	1.31
6.87	1.21
0.87	1.28
8	1.22
1.25	1.23
7.04	1.27
13.13	1.26
1	1.33
4.61	1.21
0.18	1.38
3.55	1.24
0.08	1.37
5.29	1.24
10.84	1.26
1.23	1.24
0.28	1.3
5.16	0.97
13.09	1.16
10.89	0.85
1.92	1.27
5.09	1.2
0.75	1.31
0.14	1.3
7.45	1.25
7.16	1.17
1.11	1.32
0.67	1.08
14.7	1.18
9.71	1.23
3.75	1.28
2.04	1.28
0.15	1.42
6.72	1.2
0.05	1.44
10.42	1.12
2.66	1.25
15.02	1.19
1.18	1.26
10.31	1.29
0.25	1.3
6.86	1.23
1.02	1.13
10.9	1.2
0.13	1.28
8.73	1.31
0.19	1.42
5.56	1.25
4.05	1.26
0.15	1.31
0.12	1.3
0.33	1.3
0.15	1.32
2.67	1.21
0.39	1.34
4.62	1.22
0.34	1.31
3.48	1.17
11.91	1.21
6.59	1.17
0.55	1.35
9.18	1.2
2.13	1.14
7.77	1.26
7.54	1.24
1.55	1.28
7.17	1.15
11.16	1.13
0.27	1.33
7.64	1.24
15.58	1.23
0.14	1.32
8.48	1.26
3.75	1.27
4.56	1.29
1.45	1.23
5.15	1.3
1.22	1.27
2.91	1.26
3.5	1.28
5.26	1.24
4.7	1.16
2.77	1.21
0.79	1.33
4.61	1.2
0	1.21
5.05	1.29
0.47	1.36
0.02	1.32
0.68	0.96
7.53	1.28
7.72	1.27
0.85	1.23
10.8	1.14
6.08	1.26
9.99	1.2
11.44	1.19
0.4	1.29
0.04	1.34
3.68	1.21
16.69	1.14
2.91	1.16
14.16	1.17
7.6	1.3
5.72	1.04
0.48	1.32
1.1	1.24
0.14	1.32
0.5	1.25
4.85	1.21
0.21	1.33
8.29	1.14
3.85	1.16
7.52	1.22
5.58	1.16
2.32	1.29
6.03	1.17
2.14	1.22
1.2	1.29
7.77	1.21
10.49	1.24
6.29	1.19
0.41	1.35
1.72	1.14
4.83	1.19
12.46	1.2
1.82	1.24
1.26	1.22
4.31	1.27
0.08	1.4
2.35	1.27
1.8	1.22
5.18	1.24
1.06	1.2
2.55	1.24
11.32	1.19
2.01	1.22
13.55	1.22
6.12	1.27
2.27	1.26
0.07	1.33
0.01	1.27
0.84	1.25
0.05	1.38
14.63	1.28
7.01	1.19
1.77	1.29
7.35	1.25
0.12	1.37
6.18	1.22
6.25	1.21
0.75	1.31
3.1	1.31
15.02	1.2
7.57	1.19
1.42	1.21
3.56	1.22
5.4	1.25
1.46	1.35
6.65	1.16
8.32	1.19
1.67	1.25
2.44	1.23
8.9	1.15
11.2	1.21
14.29	1.24
0.02	1.27
1.45	1.23
1.18	1.37
6.04	1.24
13.59	1.21
14.02	1.23
6.42	1.29
2.58	1.27
4.12	1.18
6.04	1.23
0.16	1.36
4.82	1.26
5.7	1.21
13.14	1.21
12.83	1.18
0.14	1.42
2.25	1.28
15.13	1.26
0.99	1.25
13.56	1.23
0.02	1.42
13.6	1.29
12.53	1.24
12.19	1.21
15.76	1.13
0.41	1.36
1.03	1.28
0.94	1.33
1.42	1.2
9.22	1.27
1.37	1.26
13.47	1.21
[truncated: 8,700 more rows]
